# Supplementary material for: Distribution Pattern of Suitable Areas and Corridor Identification of Endangered Ephedra Species in China
Source: MDPI journal article supplement (doi:10.3390/plants13060890), 2024-03-20
Supplement: s1 [file s1]

# Distribution Pattern of Suitable Areas and Corridor Identification of Endangered *Ephedra* Species in China

Huayong Zhang <sup>1,2,\*</sup>, Jiangpeng Li <sup>1</sup>, Hengchao Zou <sup>1</sup>, Zhongyu Wang <sup>1</sup>, Xinyu Zhu <sup>3</sup>, Yihe Zhang <sup>4</sup> and Zhao Liu <sup>2</sup>

- <sup>1</sup> Research Center for Engineering Ecology and Nonlinear Science, North China Electric Power University, Beijing 102206, China; 120212232021@ncepu.edu.cn (J.L.); zouhc@ncepu.edu.cn (H.Z.); zhy\_wang@ncepu.edu.cn (Z.W.)
  - <sup>2</sup> Theoretical Ecology and Engineering Ecology Research Group, School of Life Sciences, Shandong University, Qingdao 250100, China; liuzhao9555@sdu.edu.cn
  - <sup>3</sup> Dalian Eco-Environmental Affairs Service Center, 116026, No. 58 Lianshan Street, Shahekou District, Dalian 116026, China; suzaneilbeck@gmail.com
  - <sup>4</sup> School of Engineering, RMIT University, P.O. Box 71, Bundoora, VIC 3083, Australia; hen-in.zhang@rmit.edu.au
- \* Correspondence: zhanghuayong@sdu.edu.cn; Tel.: +86-010-61773936

## This word file includes

### Figure and Table Legends

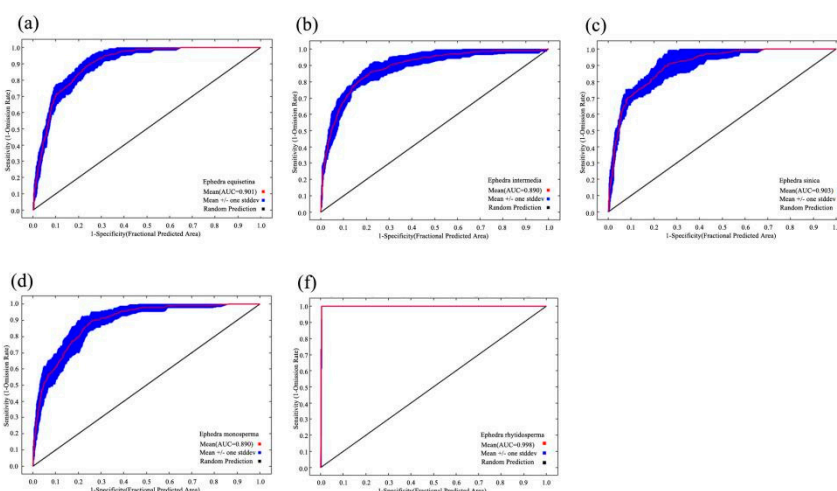

**Figure S1.** AUC training values for *E. equisetina* (a), *E. intermedia* (b), *E. sinica* (c), *E. monosperma* (d), and *E. rhytidosperra* (f).

**Table S1.** Spatial distribution of suitable areas changes of *E. equisetina*, *E. intermedia*, *E. sinica*, *E. monosperma*, and *E. rhytidosperra* under future climate scenarios.

| Species              | Scenarios       | Generally Suitable Area/ $\times 10^4 \text{ km}^2$ / | Moderately Suitable Area/ $\times 10^4 \text{ km}^2$ / | Highly Suitable Area/ $\times 10^4 \text{ km}^2$ / | Total Suitable Area/ $\times 10^4 \text{ km}^2$ /  |
|----------------------|-----------------|-------------------------------------------------------|--------------------------------------------------------|----------------------------------------------------|----------------------------------------------------|
|                      |                 | Increase or Decrease/ $\times 10^4 \text{ km}^2$ /    | Increase or Decrease/ $\times 10^4 \text{ km}^2$ /     | Increase or Decrease/ $\times 10^4 \text{ km}^2$ / | Increase or Decrease/ $\times 10^4 \text{ km}^2$ / |
| <i>E. equisetina</i> | Current climate | 107.90                                                | 47.29                                                  | 16.40                                              | 171.59                                             |
|                      | 2050s, SSP126   | 106.59/−1.31/                                         | 60.88/13.59/                                           | 24.19/7.79/                                        | 191.66/20.07/                                      |
|                      |                 | −1.21                                                 | 28.74                                                  | 47.5                                               | 11.70                                              |
|                      | 2050s, SSP370   | 110.48/2.58/                                          | 60.33/13.04/                                           | 24.82/8.42/                                        | 195.63/24.04/                                      |
|                      |                 | 2.39                                                  | 27.57                                                  | 51.34                                              | 14.01                                              |
|                      | 2050s, SSP585   | 110.62/2.72/                                          | 65.35/18.06/                                           | 27.01/10.7/                                        | 202.98/31.39/                                      |
|                      |                 | 2.52                                                  | 38.19                                                  | 65.24                                              | 18.29                                              |

|                         |                 |                         |                        |                        |                          |
|-------------------------|-----------------|-------------------------|------------------------|------------------------|--------------------------|
|                         | 2090s, SSP126   | 110.07/2.17/<br>2.01    | 61.51/14.22/<br>30.07  | 24.39/7.99/<br>48.72   | 195.97/24.38/<br>14.21   |
|                         | 2090s, SSP370   | 123.92/16.02/<br>14.85  | 75.33/28.04/<br>59.29  | 29.36/12.96/<br>79.02  | 228.61/57.02/<br>33.23   |
|                         | 2090s, SSP585   | 127.93/20.03/<br>18.56  | 85.86/38.57/<br>81.56  | 45.52/29.12/<br>177.56 | 259.31/87.72/<br>51.12   |
| <i>E. intermedia</i>    | Current climate | 93.70                   | 43.34                  | 17.62                  | 154.66                   |
|                         | 2050s, SSP126   | 110.38/16.68/<br>17.80  | 48.70/5.36/<br>12.37   | 17.16/−0.46/<br>−2.61  | 176.24/21.58/<br>13.95   |
|                         | 2050s, SSP370   | 98.22/4.52/<br>4.82     | 46.95/3.61/<br>8.33    | 42.65/25.03/<br>142.05 | 187.82/33.16/<br>21.44   |
|                         | 2050s, SSP585   | 103.88/10.18/<br>10.86  | 43.39/0.05/<br>0.11    | 17.53/−0.09/<br>−0.51  | 164.81/10.15/<br>6.56    |
|                         | 2090s, SSP126   | 99.58/5.88/<br>6.28     | 43.83/0.49/<br>1.13    | 18.22/0.60/<br>3.41    | 161.63/6.97/<br>4.51     |
|                         | 2090s, SSP370   | 114.15/20.45/<br>21.82  | 52.10/8.76/<br>20.21   | 22.66/5.04/<br>28.60   | 188.91/34.25/<br>22.15   |
|                         | 2090s, SSP585   | 128.61/34.91/<br>37.26  | 66.08/22.74/<br>52.47  | 32.59/14.97/<br>84.96  | 227.29/72.63/<br>46.96   |
|                         | Current climate | 89.77                   | 50.84                  | 14.11                  | 154.72                   |
| <i>E. sinica</i>        | 2050s, SSP126   | 85.67/−4.10/<br>−4.57   | 47.02/−3.82/<br>−7.51  | 42.80/28.69/<br>203.33 | 175.49/20.77/<br>13.42   |
|                         | 2050s, SSP370   | 98.78/9.01/<br>10.03    | 51.69/0.85/<br>1.67    | 13.53/−0.58/<br>−4.11  | 164.01/9.29/<br>6.00     |
|                         | 2050s, SSP585   | 97.61/7.84/<br>8.73     | 46.82/−4.02/<br>−7.91  | 13.14/−0.97/<br>−6.87  | 157.58/2.86/<br>1.84     |
|                         | 2090s, SSP126   | 99.41/9.64/<br>10.74    | 50.25/−0.59/<br>−1.16  | 11.73/−2.38/<br>−16.87 | 161.39/6.67/<br>4.31     |
|                         | 2090s, SSP370   | 106.04/16.27/<br>18.12  | 50.14/−0.70/<br>−1.38  | 19.62/5.51/<br>39.05   | 175.81/21.09/<br>13.63   |
|                         | 2090s, SSP585   | 112.40/22.63/<br>25.21  | 54.44/−0.40/<br>−0.79  | 18.22/4.11/<br>29.13   | 185.06/30.34/<br>19.61   |
|                         | Current climate | 124.43                  | 34.16                  | 3.05                   | 161.64                   |
|                         | 2050s, SSP126   | 110.77/−13.6/−10.98     | 30.05/−4.11/<br>−12.03 | 3.57/0.52/<br>17.05    | 144.39/−17.25/<br>−10.67 |
| <i>E. monosperma</i>    | 2050s, SSP370   | 112.71/−11.7/−9.42      | 31.66/−2.50/<br>−7.32  | 3.48/0.43/<br>14.10    | 147.84/−13.80/<br>−8.54  |
|                         | 2050s, SSP585   | 105.33/−19.1/−15.35     | 31.75/−2.41/<br>−7.06  | 4.49/1.44/<br>47.21    | 141.57/−20.07<br>−12.42  |
|                         | 2090s, SSP126   | 113.76/−10.6/−8.58      | 28.96/−5.20/<br>−15.22 | 3.29/0.24/<br>7.87     | 146.01/−15.63/<br>−9.67  |
|                         | 2090s, SSP370   | 115.75/−8.68/<br>−6.97  | 31.29/−2.87/<br>−8.40  | 4.10/1.05/<br>32.43    | 151.14/−10.50/<br>−6.50  |
|                         | 2090s, SSP585   | 107.83/−16.6/<br>−13.34 | 32.25/−1.91/<br>−5.59  | 4.34/1.29/<br>42.30    | 144.42/−17.22/<br>−10.65 |
|                         | Current climate | 1.79                    | 2.05                   | 0.64                   | 4.48                     |
| <i>E. rhytidosperma</i> | 2050s, SSP126   | 0.00/−1.79/<br>−100.00  | 0.00/−2.05/<br>−100.00 | 0.00/−0.64/<br>−100.00 | 0.00/−4.48/<br>−100.00   |
|                         | 2050s, SSP370   | 0.00/−1.79/<br>−100.00  | 0.00/−2.05/<br>−100.00 | 0.00/−0.64/<br>−100.00 | 0.00/−4.48/<br>−100.00   |
|                         | 2050s, SSP585   | 0.00/−1.79/<br>−100.00  | 0.00/−2.05/<br>−100.00 | 0.00/−0.64/<br>−100.00 | 0.00/−4.48/<br>−100.00   |
|                         | 2090s, SSP126   | 0.00/−1.79/<br>−100.00  | 0.00/−2.05/<br>−100.00 | 0.00/−0.64/<br>−100.00 | 0.00/−4.48/<br>−100.00   |
|                         | 2090s, SSP370   | 0.00/−1.79/<br>−100.00  | 0.00/−2.05/<br>−100.00 | 0.00/−0.64/<br>−100.00 | 0.00/−4.48/<br>−100.00   |
|                         | 2090s, SSP585   | 0.00/−1.79/<br>−100.00  | 0.00/−2.05/<br>−100.00 | 0.00/−0.64/<br>−100.00 | 0.00/−4.48/<br>−100.00   |
|                         | Current climate | 1.79                    | 2.05                   | 0.64                   | 4.48                     |
|                         | 2050s, SSP126   | 0.00/−1.79/<br>−100.00  | 0.00/−2.05/<br>−100.00 | 0.00/−0.64/<br>−100.00 | 0.00/−4.48/<br>−100.00   |

Table S2. Ecological source coordinates of endangered *Ephedra* species.

| Species | Coordinates of Ecological Sources | Location |
|---------|-----------------------------------|----------|
|---------|-----------------------------------|----------|

|                                |                 |                                                       |
|--------------------------------|-----------------|-------------------------------------------------------|
| <i>E. equisetina</i><br>(9)    | 37.97N, 106.31E | Liangzhou district, Gansu Province                    |
|                                | 36.36N, 106.15E | Yongdeng County, Gansu Province                       |
|                                | 36.51N, 107.13E | Jingyuan County, Gansu Province                       |
|                                | 37.54N, 106.12E | Hongsi Pu District, Ningxia                           |
|                                | 38.91N, 107.25E | Etoke Banner, Inner Mongolia                          |
|                                | 37.08N, 109.68E | Zichang City, Shaanxi Province                        |
|                                | 34.89N, 109.74E | Pucheng County, Shaanxi Province                      |
|                                | 37.40N, 112.23E | Wenshui County, Shanxi Province                       |
| <i>E. intermedia</i><br>(7)    | 36.24N, 112.82E | Zhangzi County, Shanxi Province                       |
|                                | 37.97N, 102.58E | Liangzhou district, Gansu Province                    |
|                                | 36.50N, 102.71E | Ledu District, Qinghai Province                       |
|                                | 35.31N, 104.08E | Lintao County, Gansu Province                         |
|                                | 36.14N, 104.50E | Yuzhong County, Gansu Province                        |
|                                | 36.63N, 105.71E | Haiyuan County, Ningxia                               |
|                                | 35.87N, 106.60E | Pengyang County, Ningxia                              |
|                                | 36.87N, 108.09E | Wuqi County, Shaanxi Province                         |
| <i>E. sinica</i><br>(9)        | 38.76N, 108.52E | Uxin Banner, Inner Mongolia                           |
|                                | 41.98N, 111.90E | Siziwang Banner, Inner Mongolia                       |
|                                | 40.59N, 111.65E | Tumd East Banner, Inner Mongolia                      |
|                                | 39.68N, 113.14E | Ying County, Shanxi Province                          |
|                                | 38.12N, 112.97E | Meng County, Shanxi Province                          |
|                                | 38.52N, 114.67E | Quyang County, Hebei Province                         |
|                                | 41.50N, 114.13E | Shangyi County, Hebei Province                        |
|                                | 42.51N, 119.03E | Wengniute Banner, Inner Mongolia                      |
| <i>E. monosperma</i><br>(8)    | 43.92N, 120.12E | Ar Horqin Banner, Inner Mongolia                      |
|                                | 37.24N, 100.54E | Haiyan County, Qinghai Province                       |
|                                | 36.77N, 101.03E | Hangyuan County, Qinghai Province                     |
|                                | 36.90N, 101.71E | Datong Hui and Tu Autonomous County, Qinghai Province |
|                                | 35.24N, 100.72E | Tongde County, Qinghai Province                       |
|                                | 34.90N, 101.50E | Zeku County, Qinghai Province                         |
|                                | 35.53N, 100.72E | Tongren City, Qinghai Province                        |
|                                | 34.88N, 102.87E | Xiahe County, Gansu Province                          |
| <i>E. rhytidosperma</i><br>(8) | 33.64N, 102.55E | Ruoergui County, Sichuan Province                     |
|                                | 37.17N, 104.10E | Jingtai County, Gansu Province                        |
|                                | 36.89N, 104.31E | Jingtai County, Gansu Province                        |
|                                | 36.72N, 104.54E | Jingyuan County, Gansu Province                       |
|                                | 37.30N, 104.72E | Shapotou District, Ningxia                            |
|                                | 37.37N, 105.49E | Shapotou District, Ningxia                            |
|                                | 37.43N, 105.90E | Hongsi Pu District, Ningxia                           |
|                                | 38.14N, 105.98E | Qingtongxia City, Ningxia                             |
|                                | 39.20N, 106.64E | Huinong District, Ningxia                             |
